# Supplementary material
Source: ML conference proceedings conference paper supplement (https://proceedings.neurips.cc/paper_files/paper/2016/hash/23c97e9cb93576e45d2feaf00d0e8502-Abstract.html)
Supplement: Supplementary file 1 [file 23c97e9cb93576e45d2feaf00d0e8502-Supplemental.zip]

## Appendices

### A Proof of Proposition 1

Recall that  $h = t_j - t_{j-1}$  for all  $j$ . Straightforward substitutions into the definitions give that  $\phi_i \equiv \phi(0) = (0, 1, 0, \dots, 0)$ ,  $\phi_{i-1} \equiv \phi(-h) = (0, 0, 1, \dots, 0)$  etc. and hence  $\phi_{i-p}^T \phi_{i-q} = \delta_{pq}$ , for all  $0 \leq p, q \leq s-1$ . Furthermore  $\Phi_i \equiv \Phi(0) = (1, 0, 0, \dots, 0)$  since every component of  $\Phi(\omega)$  bar the first is a polynomial of degree  $s$  with a factor  $\omega$ . Finally

$$\Phi_{i+1} \equiv \Phi(h) = \begin{pmatrix} 1 & \int_0^h \ell_0^{0:s-1}(\omega) d\omega & \dots & \int_0^h \ell_{s-1}^{0:s-1}(\omega) d\omega \end{pmatrix}$$

Now by (10) and the standard formulae for Gaussian conditioning, we have

$$\begin{aligned} \mathbb{E}[y_{i+1} | y_i, f_{i-s+1:i}] &= \\ &= \begin{pmatrix} \Phi_{i+1}^T \Phi_i \\ \Phi_{i+1}^T \phi_i \\ \vdots \\ \Phi_{i+1}^T \phi_{i-s+1} \end{pmatrix}^T \underbrace{\begin{pmatrix} \Phi_i^T \Phi_i & \Phi_i^T \phi_i & \dots & \Phi_i^T \phi_{i-s+1} \\ \phi_i^T \Phi_i & \phi_i^T \phi_i & \dots & \phi_i^T \phi_{i-s+1} \\ \vdots & \vdots & \ddots & \vdots \\ \phi_{i-s+1}^T \Phi_i & \phi_{i-s+1}^T \phi_{i+1} & \dots & \phi_{i-s+1}^T \phi_{i-s+1} \end{pmatrix}^{-1}}_{\mathbb{I}_{s+1}^{-1}} \begin{pmatrix} y_i \\ f_i \\ \vdots \\ f_{i-s+1} \end{pmatrix} \\ &= (\Phi_{i+1}^T \Phi_i) y_i + \sum_{k=0}^{s-1} (\Phi_{i+1}^T \phi_{i-k}) f_{i-k} \\ &= y_i + \sum_{k=0}^{s-1} [\Phi_{i+1}]_{k+2} \cdot f_{i-k} \quad \left( \text{where } [\Phi_{i+1}]_{k+2} \text{ denotes the } (k+2)\text{th component of } \Phi_{i+1} \right) \\ &= y_i + \sum_{k=0}^{s-1} \left[ \int_0^h \ell_k^{0:s-1}(\omega) d\omega \right] \cdot f_{i-k} \\ &= y_i + h \sum_{k=0}^{s-1} c_{k,s} f_{i-k} \quad \text{since } \int_0^h \ell_k^{0:s-1}(\omega) d\omega = h c_{k,s} \end{aligned}$$

which is equal to the  $s$ -step Adams-Bashforth predictor defined by (6) and (7). Next we write

$$\begin{aligned} \text{Var}[y_{i+1} | y_i, f_{i-s+1:i}] &= \Phi_{i+1}^T \Phi_{i+1} - \begin{pmatrix} \Phi_{i+1}^T \Phi_i \\ \Phi_{i+1}^T \phi_i \\ \vdots \\ \Phi_{i+1}^T \phi_{i-s+1} \end{pmatrix}^T \mathbb{I}_{s+1}^{-1} \begin{pmatrix} \Phi_i^T \Phi_{i+1} \\ \phi_i^T \Phi_{i+1} \\ \vdots \\ \phi_{i-s+1}^T \Phi_{i+1} \end{pmatrix} \\ &= \Phi_{i+1}^T \Phi_{i+1} - \begin{pmatrix} 1 \\ [\Phi_{i+1}]_2 \\ \vdots \\ [\Phi_{i+1}]_{s+1} \end{pmatrix}^T \begin{pmatrix} 1 \\ [\Phi_{i+1}]_2 \\ \vdots \\ [\Phi_{i+1}]_{s+1} \end{pmatrix} \\ &= \Phi_{i+1}^T \Phi_{i+1} - \Phi_{i+1}^T \Phi_{i+1} \\ &= 0 \end{aligned}$$

and the proposition follows.

### B Proof of Proposition 2

We follow the same reasoning as in Proposition 1. Since the additional basis function at the end of  $\phi_{i-k}^+$  is clearly zero at for all  $0 \leq k \leq s-1$ , each inner product of the form  $\phi^{+T} \phi^+$ ,  $\Phi^{+T} \phi^+$  and  $\phi^{+T} \Phi^+$  is equal to the corresponding inner product  $\phi^T \phi$ ,  $\Phi^T \phi$  and  $\phi^T \Phi$  as no additional

contribution from the new extended basis arises. It therefore suffices to check only the terms of the form  $\Phi^{+T} \Phi$ .

Integrating the additional basis function gives a polynomial of degree  $s + 1$  with a constant factor  $\omega$ . Evaluating this at  $t_i = 0$  means that the additional term is also 0 in  $\Phi_i$ . Therefore  $\Phi_{i+1}^{+T} \Phi_i^+ = \Phi_{i+1}^T \Phi_i$  and  $\Phi_i^{+T} \Phi_i^+ = \Phi_i^T \Phi_i$ . It follows that the expression for  $\mathbb{E}[y_{i+1}|y_i, f_{i-s+1:i}]$  is exactly the same as when using the unaugmented basis function set.

The argument in the previous paragraph means we can immediately write down that

$$\text{Var}[y_{i+1}|y_i, f_{i-s+1:i}] = \Phi_{i+1}^{+T} \Phi_{i+1}^+ - \Phi_{i+1}^T \Phi_{i+1}$$

Since the first  $s + 1$  components of  $\Phi_{i+1}^{+T}$  are equal to the  $s + 1$  components of  $\Phi_{i+1}^T$ , this expression reduces to the contribution of the augmented basis element. Therefore

$$\begin{aligned} \text{Var}[y_{i+1}|y_i, f_{i-s+1:i}] &= \left( \alpha h^s \int_0^h \ell_{-1}^{-1:s-1}(\omega) d\omega \right)^2 \\ &= (\alpha h^{s+1} \beta_{-1,s+1}^{AM})^2 \end{aligned}$$

The Adams-Moulton coefficient  $\beta_{-1,s+1}^{AM}$  is equal to the local truncation error constant for the  $s$ -step Adams-Bashforth method [12] and the proposition follows.

### C Extension to Adams-Moulton

We collect here the straightforward modifications required to the constructions in the main paper to produce implicit Adams-Moulton methods instead of explicit Adams-Bashforth versions.

The telescopic decomposition (5) becomes

$$p(y_{1:N}, f_{0:N}|y_0) = \prod_{i=0}^N p(f_i|y_i) \times \prod_{i=0}^{N-1} p(y_{i+1}|y_i, f_{\max(0, i-s+1):i+1}) \quad (14)$$

where it is particularly to be noted that  $f_N$  is no longer superfluous.

The Lagrange interpolation resulting in the the Adams-Moulton method is

$$Q_i(\omega) = \sum_{j=-1}^{s-1} \ell_j^{-1:s-1}(\omega) f_{i-j} \quad \ell_j^{-1:s-1}(\omega) = \prod_{\substack{k=-1 \\ k \neq j}}^{s-1} \frac{\omega - t_{i-k}}{t_{i-j} - t_{i-k}}, \quad (15)$$

the analogous vectors of basis polynomials to (8) and (9) are

$$\psi(\omega) = \begin{pmatrix} 0 & \ell_{-1}^{-1:s-1}(\omega) & \ell_0^{-1:s-1}(\omega) & \ell_1^{-1:s-1}(\omega) & \dots & \ell_{s-1}^{-1:s-1}(\omega) \end{pmatrix}^T \quad (16)$$

$$\Psi(\omega) = \int \psi(\omega) d\omega = \begin{pmatrix} 1 & \int \ell_{-1}^{-1:s-1}(\omega) d\omega & \dots & \int \ell_{s-1}^{-1:s-1}(\omega) d\omega \end{pmatrix}^T \quad (17)$$

and the iterator is defined by

$$y_{i+1} - y_i \approx \int_{t_i}^{t_{i+1}} Q_i(\omega) d\omega = h \sum_{j=-1}^{s-1} \beta_{j,s+1}^{AM} f_{i-j} \quad (18)$$

with  $\beta_{j,s+1}^{AM} \equiv h^{-1} \int_0^h \ell_j^{-1:s-1}(\omega) d\omega$  are the Adams-Moulton coefficients.

The Gaussian process prior resulting in AM is

$$\begin{pmatrix} y_{i+1} \\ y_i \\ f_{i+1} \\ f_i \\ f_{i-1} \\ \vdots \\ f_{i-s+1} \end{pmatrix} = \mathcal{N} \left[ \begin{pmatrix} 0 \\ 0 \\ 0 \\ 0 \\ 0 \\ \vdots \\ 0 \end{pmatrix}, \begin{pmatrix} \Psi_{i+1}^T \Psi_{i+1} & \Psi_{i+1}^T \Psi_i & \Psi_{i+1}^T \psi_{i+1} & \cdots & \Psi_{i+1}^T \psi_{i-s+1} \\ \Psi_i^T \Psi_{i+1} & \Psi_i^T \Psi_i & \Psi_i^T \psi_{i+1} & \cdots & \Psi_i^T \psi_{i-s+1} \\ \psi_{i+1}^T \Psi_{i+1} & \psi_{i+1}^T \Psi_i & \psi_{i+1}^T \psi_{i+1} & \cdots & \psi_{i+1}^T \psi_{i-s+1} \\ \psi_i^T \Psi_{i+1} & \psi_i^T \Psi_i & \psi_i^T \psi_{i+1} & \cdots & \psi_i^T \psi_{i-s+1} \\ \psi_{i-1}^T \Psi_{i+1} & \psi_{i-1}^T \Psi_i & \psi_{i-1}^T \psi_{i+1} & \cdots & \psi_{i-1}^T \psi_{i-s+1} \\ \vdots & \vdots & \vdots & \ddots & \vdots \\ \psi_{i-s+1}^T \Psi_{i+1} & \psi_{i-s+1}^T \Psi_i & \psi_{i-s+1}^T \psi_{i+1} & \cdots & \psi_{i-s+1}^T \psi_{i-s+1} \end{pmatrix} \right] \quad (19)$$

#### D Adams-Moulton integrator with $s = 4$

The conditional distribution of interest is  $p(y_{i+1}|y_i, f_{i+1}, f_i, f_{i-1}, f_{i-2}) \equiv p(y_{i+1}|y_i, f_{i+1:i-2})$ . In the deterministic case the vectors of basis functions become

$$\psi(\omega)_{s=4} = \begin{pmatrix} 0 & \frac{\omega(\omega+h)(\omega+2h)}{-6h^3} & \frac{(\omega-h)(\omega+h)(\omega+2h)}{2h^3} & \frac{\omega(\omega-h)(\omega+2h)}{-2h^3} & \frac{\omega(\omega-h)(\omega+h)}{6h^3} \end{pmatrix} \quad (20)$$

$$\Psi(\omega)_{s=4} = \begin{pmatrix} 1 & \frac{\omega^2(2h+\omega)^2}{24h^3} & \frac{\omega(3\omega^3+8h\omega^2-6h^2\omega-2fh^3)}{-24h^3} & \frac{\omega^2(3\omega^2+4h\omega-12h^2)}{24h^3} & \frac{\omega^2(\omega^2-2h^2)}{-24h^3} \end{pmatrix} \quad (21)$$

and the resulting calculations give

$$\mathbb{E}(y_{i+1}|y_i, f_{i+1:i-2}) = y_i + h \left( \frac{3}{8}f_{i+1} + \frac{19}{24}f_i - \frac{5}{24}f_{i-1} + \frac{1}{24}f_{i-2} \right)$$

$$\text{Var}(y_{i+1}|y_i, f_{i+1:i-2}) = 0$$

The probabilistic version is

$$\psi^+(\omega)_{s=4} = \begin{pmatrix} \cdots \psi(\omega)_{s=4} \cdots & \frac{\alpha\omega(\omega-h)(\omega+h)(\omega+2h)}{24} \end{pmatrix} \quad (22)$$

$$\Psi^+(\omega)_{s=4} = \begin{pmatrix} \cdots \Psi(\omega)_{s=4} \cdots & \frac{\alpha\omega^2(6\omega^3+15\omega^2h-10\omega h^2-30h^3)}{720} \end{pmatrix} \quad (23)$$

and further calculation shows that

$$\mathbb{E}(y_{i+1}|y_i, f_{i-1:i+2}) = y_i + h \left( \frac{3}{8}f_{i+1} + \frac{19}{24}f_i - \frac{5}{24}f_{i-1} + \frac{1}{24}f_{i-2} \right) \quad (24)$$

$$\text{Var}[y_{i+1}|y_i, f_{i+1:i-2}] = \left( \frac{19h^5\alpha}{720} \right)^2 \quad (25)$$

#### Remark

Proofs analogous to those of Propositions 1 and 2, for the Adams-Moulton case, follow the same line of reasoning as for the Adams-Bashforth case.

#### E Expansion of backward difference coefficient approximation for $s = 3$

From (13), we have for  $s = 3$

$$\begin{aligned} y_{i+1} &= y_i + h \left( \frac{23}{12}f_i - \frac{4}{3}f_{i-1} + \frac{5}{12}f_{i-2} \right) - \frac{3}{8}h^4 y^{(4)}(t_{i+1}) + O(h^5) \\ &= y_i + h \left( \frac{23}{12}f_i - \frac{4}{3}f_{i-1} + \frac{5}{12}f_{i-2} \right) - \frac{3}{8}h^4 f'''(t_{i+1}) + O(h^5) \\ &= y_i + h \left( \frac{23}{12}f_i - \frac{4}{3}f_{i-1} + \frac{5}{12}f_{i-2} \right) - \frac{3}{8}h^4 \left[ \frac{-f_i + 3f_{i-1} - 3f_{i-2} + f_{i-3}}{h^3} + O(h) \right] + O(h^5) \\ &= y_i + h \underbrace{\left( \frac{55}{24}f_i - \frac{59}{24}f_{i-1} + \frac{37}{24}f_{i-2} - \frac{3}{8}f_{i-3} \right)}_{\text{AB4}} + O(h^5) \end{aligned}$$

## F Proof of Theorem 3

Proposition 2 implies that our integrator can be written as

$$y_{i+1} = y_i + h \sum_{j=0}^{s-1} \beta_{j,s}^{AB} f(y_{i-j}, t_{i-j}) + \xi_i \quad (26)$$

where  $y_i$  denotes the numerical solution at iteration  $i$ , and  $\xi_i \in \mathbb{R}^d$  is a Gaussian random variable satisfying  $\mathbb{E}|\xi_i \xi_i^T| = Q h^{2s+2}$  for some fixed  $d \times d$  matrix  $Q$ . We denote the true solution of the ODE (1) at iteration  $i$  by  $Y_i \equiv y(t_i)$  and we have that

$$Y_{i+1} = Y_i + h \sum_{j=0}^{s-1} \beta_{j,s}^{AB} f(Y_{i-j}, t_{i-j}) + \tau_i \quad (27)$$

where by construction the local truncation error  $\tau_i = O(h^{s+1})$ . If we now subtract (26) from (27) and denote the accumulated error at iteration  $i$  by  $E_i = Y_i - y_i$ , we have

$$E_{i+1} = E_i + \Delta\phi_i + \tau_i - \xi_i$$

where

$$\Delta\phi_i := h \sum_{j=0}^{s-1} \beta_{j,s}^{AB} \Delta f_{i-j}, \quad \Delta f_{i-j} := f(Y_{i-j}, t_{i-j}) - f(y_{i-j}, t_{i-j})$$

We will rearrange this  $s$ -step recursion to give an equivalent one-step recursion in an higher-dimensional space. In particular, using the trivial identities  $E_{i-1} = E_{i-1}, \dots, E_{i-s+1} = E_{i-s+1}$  we obtain

$$\underbrace{\begin{pmatrix} E_{i+1} \\ E_i \\ \vdots \\ E_{i-s+2} \end{pmatrix}}_{=: \mathcal{E}_{i+1}} = \underbrace{\begin{pmatrix} \mathbb{I}_d & 0 & \cdots & 0 \\ \mathbb{I}_d & 0 & \cdots & 0 \\ & \ddots & \ddots & \\ 0 & & \mathbb{I}_d & 0 \end{pmatrix}}_{=: \mathcal{A}} \underbrace{\begin{pmatrix} E_i \\ E_{i-1} \\ \vdots \\ E_{i-s+1} \end{pmatrix}}_{=: \mathcal{E}_i} + \underbrace{\begin{pmatrix} \Delta\phi_i \\ 0 \\ \vdots \\ 0 \end{pmatrix}}_{=: \Delta\Phi_i} + \underbrace{\begin{pmatrix} \tau_i \\ 0 \\ \vdots \\ 0 \end{pmatrix}}_{=: \mathcal{T}_i} - \underbrace{\begin{pmatrix} \xi_i \\ 0 \\ \vdots \\ 0 \end{pmatrix}}_{=: \Xi_i}$$

or in compact form,

$$\mathcal{E}_{i+1} = \mathcal{A}\mathcal{E}_i + \Delta\Phi_i + \mathcal{T}_i - \Xi_i, \quad i = s-1, \dots, N-1, \quad N = T/h \quad (28)$$

For the subsequent calculations it will be necessary to find a scalar product inducing a matrix norm such that the norm of the matrix  $\mathcal{A}$  is less or equal to 1. This is possible if the eigenvalues of the Frobenius matrix  $\mathcal{A}$  lie inside the unit circle on the complex plane and are simple if their modulus is equal to 1. It is easy to show that the eigenvalues of  $\mathcal{A}$  are roots of the characteristic polynomial associated with the deterministic integrator (7). Since we have assumed that the deterministic integrator is convergent,  $\mathcal{A}$  does have the claimed property, since it is equivalent to the root condition in Dahlquist's equivalence theorem [12]. Thus there exists a non-singular matrix  $\Lambda$  with a block structure like  $\mathcal{A}$  such that  $\|\Lambda^{-1}\mathcal{A}\Lambda\|_2 \leq 1$ . We can therefore choose a scalar product for  $\mathcal{X}, \mathcal{Y} \in \mathbb{R}^{ds}$  as

$$\langle \mathcal{X}, \mathcal{Y} \rangle_* := \langle \Lambda^{-1}\mathcal{X}, \Lambda^{-1}\mathcal{Y} \rangle_2$$

and then have  $\|\cdot\|_*$  and  $\|\cdot\|_*$  as the induced vector and matrix norms respectively, with  $\|\mathcal{A}\|_* = \|\Lambda^{-1}\mathcal{A}\Lambda\|_2 \leq 1$  as required. We also have

$$\langle \mathcal{X}, \mathcal{Y} \rangle_* = \mathcal{X}^T \Lambda^{-T} \Lambda^{-1} \mathcal{Y} = \mathcal{X}^T \Lambda^* \mathcal{Y} \text{ with } \Lambda^* = \Lambda^{-T} \Lambda^{-1} = (\lambda_{ij}^* \otimes \mathbb{I}_d)_{1 \leq i, j \leq s} \quad (29)$$

Due to the equivalence of norms there exist constants  $c^*, c_* > 0$  such that

$$|\mathcal{X}|_2^2 \leq c^* |\mathcal{X}|_*^2 \quad \text{and} \quad |\mathcal{X}|_*^2 \leq c_* |\mathcal{X}|_\infty^2 \quad \text{for all } \mathcal{X} \in \mathbb{R}^{ds}, \quad (30)$$

where  $|\mathcal{X}|_2^2 = \sum_{j=1, \dots, s} |x_j|^2$  and  $|\mathcal{X}|_\infty = \max_{j=1, \dots, s} |x_j|$  for  $\mathcal{X} = (x_1^T, \dots, x_s^T)^T$ ,  $x_j \in \mathbb{R}^d$ .

For the particular vectors  $\tilde{\mathcal{X}} = (x^T, 0, \dots, 0)^T$  and  $\tilde{\mathcal{Y}} = (y^T, 0, \dots, 0)^T$  with  $\tilde{\mathcal{X}}, \tilde{\mathcal{Y}} \in \mathbb{R}^{ds}$  and  $x, y \in \mathbb{R}^d$ , one has

$$\langle \tilde{\mathcal{X}}, \tilde{\mathcal{Y}} \rangle_* = \lambda_{11}^* \langle x, y \rangle_2 = \lambda_{11}^* x^T y, \quad (31)$$

where  $\lambda_{11}^*$  is as in (29). Applying the norm  $|\cdot|_*^2$  to (28) and taking expectations gives

$$\begin{aligned}
\mathbb{E}|\mathcal{E}_{i+1}|_*^2 &= \mathbb{E}|\mathcal{A}\mathcal{E}_i + \Delta\Phi_i + \mathcal{T}_i - \Xi_i|_*^2 \\
&= \mathbb{E}|\mathcal{A}\mathcal{E}_i + \Delta\Phi_i + \mathcal{T}_i|_*^2 + O(h^{2s+2}) \\
&= \mathbb{E}|\mathcal{A}\mathcal{E}_i + \Delta\Phi_i|_*^2 + 2\mathbb{E}\langle h^{1/2}(\mathcal{A}\mathcal{E}_i + \Delta\Phi_i), \mathcal{T}_i h^{-1/2} \rangle_* + \mathbb{E}|\mathcal{T}_i|_*^2 + O(h^{2s+2}) \\
&= \mathbb{E}|\mathcal{A}\mathcal{E}_i + \Delta\Phi_i|_*^2 + 2\mathbb{E}\langle h^{1/2}(\mathcal{A}\mathcal{E}_i + \Delta\Phi_i), \mathcal{T}_i h^{-1/2} \rangle_* + O(h^{2s+2})
\end{aligned} \tag{32}$$

We now consider the term  $|\mathcal{A}\mathcal{E}_i + \Delta\Phi_i|_*^2$  and expand it as

$$|\mathcal{A}\mathcal{E}_i + \Delta\Phi_i|_*^2 = \underbrace{|\mathcal{A}\mathcal{E}_i|_*^2}_A + \underbrace{|\Delta\Phi_i|_*^2}_B + \underbrace{2\langle \mathcal{A}\mathcal{E}_i, \Delta\Phi_i \rangle_*}_C$$

For term A we immediately have  $|\mathcal{A}\mathcal{E}_i|_*^2 \leq |\mathcal{E}_i|_*^2$  by construction of the norm  $|\cdot|_*$ .

For term B we have that

$$\begin{aligned}
|\Delta\Phi_i|_*^2 &= \lambda_{11}^* |\Delta\phi_i|^2 && \text{from (31)} \\
&= \lambda_{11}^* \left| h \sum_{j=0}^{s-1} \beta_{j,s}^{AB} \Delta f_{i-j} \right|^2 \\
&\leq \lambda_{11}^* s h^2 \sum_{j=0}^{s-1} |\beta_{j,s}^{AB} \Delta f_{i-j}|^2 && \text{by Cauchy-Schwarz} \\
&\leq \lambda_{11}^* s h^2 L_f^2 \sum_{j=0}^{s-1} (\beta_{j,s}^{AB})^2 |E_{i-j}|^2 && \text{since } f \text{ is Lipschitz} \\
&\leq \lambda_{11}^* s h^2 L_f^2 C_\beta^2 \sum_{j=0}^{s-1} |E_{i-j}|^2 && \text{where } C_\beta^2 = \max_{j=0, \dots, s-1} \beta_{j,s}^{AB} \\
&\leq \lambda_{11}^* s h^2 L_f^2 C_\beta^2 c^* |\mathcal{E}_i|_*^2 && \text{from (30)} \\
&=: \Gamma^2 h^2 |\mathcal{E}_i|_*^2 && \text{where } \Gamma^2 = \lambda_{11}^* s L_f^2 C_\beta^2 c^*
\end{aligned}$$

For term C we have  $2\langle \mathcal{A}\mathcal{E}_i, \Delta\Phi_i \rangle_* \leq 2|\mathcal{A}\mathcal{E}_i|_* |\Delta\Phi_i|_* \leq 2\Gamma h |\mathcal{E}_i|_*^2$  and it follows that

$$|\mathcal{A}\mathcal{E}_i + \Delta\Phi_i|_*^2 \leq (1 + O(h)) |\mathcal{E}_i|_*^2$$

Then from (32) we have

$$\begin{aligned}
\mathbb{E}|\mathcal{E}_{i+1}|_*^2 &= \mathbb{E}|\mathcal{A}\mathcal{E}_i + \Delta\Phi_i|_*^2 + 2\mathbb{E}\langle h^{1/2}(\mathcal{A}\mathcal{E}_i + \Delta\Phi_i), \mathcal{T}_i h^{-1/2} \rangle_* + O(h^{2s+2}) \\
&\leq (1 + O(h)) \mathbb{E}|\mathcal{E}_i|_*^2 + 2h \mathbb{E}|\mathcal{A}\mathcal{E}_i + \Delta\Phi_i|_*^2 + 2h^{-1} \mathbb{E}|\mathcal{T}_i|_*^2 + O(h^{2s+2}) \\
&\leq (1 + O(h)) \mathbb{E}|\mathcal{E}_i|_*^2 + O(h^{2s+1}) + O(h^{2s+2})
\end{aligned} \tag{33}$$

Then by applying the Gronwall inequality we have (for different  $K$  in each line)

$$\max_{0 \leq kh \leq T} \mathbb{E}|\mathcal{E}_k|_*^2 \leq K(T) h^{2s}$$

and since  $\mathcal{E}_k = (E_k, E_{k-1}, \dots, E_{k-s+1})$  we conclude that

$$\max_{0 \leq kh \leq T} \mathbb{E}|E_k|^2 \leq K(T) h^{2s}$$

Note that in (33), the  $O(h^{2s+2})$  term derived from the introduced perturbations  $\xi_i$  is of one higher order than the  $O(h^{2s+1})$  term representing the truncation error in the deterministic solver. This observation implies that a noise vector satisfying  $\mathbb{E}|\xi_i \xi_i^T| = Q h^{2s+1}$  would also give rise to an integrator of order  $s$ .

#### Remark

An analogous proof for the Adams-Moulton case follows with straightforward modifications.
